# Supplementary material for: Engineering high-valence nickel sites in Ni3S2/Ni3Se2 architectures enabling urea-assisted hydrogen evolution reactions
Source: Royal Society of Chemistry journal article supplement (doi:10.1039/d4gc04318a), 2024-01-01
Supplement: d4gc04318a1.pdf [file d4gc04318a1.pdf]

## Supporting Information

### Engineering high-valence nickel sites in Ni<sub>3</sub>S<sub>2</sub>/Ni<sub>3</sub>Se<sub>2</sub> architectures enabling urea-assisted hydrogen evolution reaction

Taotao Ai<sup>a,1,\*</sup>, Miaomiao Bai<sup>b,1</sup>, Weiwei Bao<sup>a,\*</sup>, Jie Han<sup>a</sup>, Xueling Wei<sup>a</sup>, Xiangyu Zou<sup>a</sup>, Jungang Hou<sup>b</sup>, Lizhai Zhang<sup>a</sup>, Zhifeng Deng<sup>a</sup>, Yuxin Zhang<sup>c,\*</sup>

<sup>a</sup>National and Local Joint Engineering Laboratory for Slag Comprehensive Utilization and Environmental Technology, School of Materials Science and Engineering, Shaanxi University of Technology, Hanzhong 723000, Shaanxi, China.

<sup>b</sup>College of Chemistry and Materials Science, Northwestern University, Xi'an 710100, China.

<sup>c</sup>School of Chemical Engineering, Dalian University of Technology, Dalian 116024, China.

<sup>d</sup>College of Materials Science and Engineering, Chongqing University, Chongqing 400044, China.

<sup>1</sup>These authors contributed equally to this work

#### \*Corresponding Author

Taotao Ai, E-mail: aitaotao0116@126.com

Weiwei Bao, E-mail: baowei1834@163.com

Yuxin Zhang, E-mail: zhangyuxin@cqu.edu.cn

Number of pages: 27

Number of Figures: 16

Number of Tables: 1

## List of Contents

### 1. Experimental Section:

1.1 Materials

1.2 Preparation of RuO<sub>2</sub> electrode on NF

1.3 General characterizations

1.4 Electrochemical Test

### 2. Supplementary Figures:

**Fig. S1.** Optical image of (a) the bare NF, (b) Ni<sub>3</sub>S<sub>2</sub>/NF, (c) Ni<sub>3</sub>Se<sub>2</sub>/NF, (d) Ni<sub>3</sub>S<sub>2</sub>@Ni<sub>3</sub>Se<sub>2</sub>/NF and (e) RuO<sub>2</sub>/NF, respectively.

**Fig. S2.** The SEM images of bare NF (a) with low magnification, (b) with high magnification.

**Fig. S3.** The EDS spectrum of Ni<sub>3</sub>S<sub>2</sub>@Ni<sub>3</sub>Se<sub>2</sub>/NF electrode.

**Fig. S4.** Comparison of overpotentials of different current densities under OER test in 1 M KOH electrolyte.

**Fig. S5.** (a) comparisons of the EIS parameter and (b) Polarization curves were recorded initially and after 2000 CV cycles for Ni<sub>3</sub>S<sub>2</sub>@Ni<sub>3</sub>Se<sub>2</sub>/NF of urea test in 1 M KOH + 0.33 M urea.

**Fig. S6.** Comparisons of the EIS parameter of OER test in 1.0 M KOH.

**Fig. S7.** Electrocatalytic stability. (a-b) Polarization curves and Nyquist plots of Ni<sub>3</sub>S<sub>2</sub>@Ni<sub>3</sub>Se<sub>2</sub>/NF electric catalyst initially as well as after 2000 CV cycles; (c) Chronopotentiometry curve of the Ni<sub>3</sub>S<sub>2</sub>@Ni<sub>3</sub>Se<sub>2</sub>/NF recorded at 1.67 V for 100 h; (d) Time-dependent concentration of dissolved Ni and Se in 1 M KOH.

**Fig. S8.** Active site test CV curves of (a) Ni<sub>3</sub>S<sub>2</sub>/NF, (b) Ni<sub>3</sub>Se<sub>2</sub>/NF, (c) Ni<sub>3</sub>S<sub>2</sub>@Ni<sub>3</sub>Se<sub>2</sub>/NF, (d) RuO<sub>2</sub>/NF and (e) Bare NF at different scanning rates in 1 M KOH; (f) current density as a function of scanning rate.

**Fig. S9.** Active site test CV curves of (a) Ni<sub>3</sub>S<sub>2</sub>@Ni<sub>3</sub>Se<sub>2</sub>/NF, (b) Ni<sub>3</sub>S<sub>2</sub>/NF (c) Ni<sub>3</sub>Se<sub>2</sub>/NF, (d) Bare NF at different scanning rates in 1 M KOH + 0.33 M urea; (e) current density as a function of scanning rate, (f) ECSA-normalized LSV curves.

**Fig. S10.** (a) The physical characterization for Ni<sub>3</sub>S<sub>2</sub>@Ni<sub>3</sub>Se<sub>2</sub>/NF after OER test. The XPS survey spectrum of Ni<sub>3</sub>S<sub>2</sub>@Ni<sub>3</sub>Se<sub>2</sub>/NF, the spectra of (b) Ni 2p, (c) S 2p, and (d) Se 3d of Ni<sub>3</sub>S<sub>2</sub>@Ni<sub>3</sub>Se<sub>2</sub>/NF.

**Fig. S11.** (a) EIS Nyquist plots of  $\text{Ni}_3\text{S}_2@\text{Ni}_3\text{Se}_2/\text{NF}$ ,  $\text{Ni}_3\text{S}_2/\text{NF}$ ,  $\text{Ni}_3\text{Se}_2/\text{NF}$ , Pt/C/NF and Bare NF. (b) Comparisons of the EIS parameter. (c) Polarization curves were recorded initially and after 2000 CV cycles for  $\text{Ni}_3\text{S}_2@\text{Ni}_3\text{Se}_2/\text{NF}$ .

**Fig. S12.** (a)  $\text{Ni}_3\text{S}_2@\text{Ni}_3\text{Se}_2/\text{NF}$  polarization curves in different electrolytes, (b) XRD, (c-d) SEM images and (e) EDX elemental mappings of  $\text{Ni}_3\text{S}_2@\text{Ni}_3\text{Se}_2/\text{NF}$  before and after stability test.

**Fig. S13.** The Faraday efficiency vs time plots in hydrogen production system assisted by urea electrocatalysis

**Fig. S14.** (a)  $\text{Ni}_3\text{S}_2$  (211) surface structure model; and (b) the structure model of adsorption of  $\text{H}_2\text{O}$ ; (c) Structure model of adsorption of  $\text{H}_2\text{O}$  (intermediate); (d) Structure model of adsorption of OH+H; (e) Structure model of adsorption H.

**Fig. S15.** (a)  $\text{Ni}_3\text{Se}_2$  (211) surface structure model; and (b) the structure model of adsorption of  $\text{H}_2\text{O}$ ; (c) Structure model of adsorption of  $\text{H}_2\text{O}$  (intermediate); (d) Structure model of adsorption of OH+H; (e) Structure model of adsorption H.

**Fig. S16.** (a)  $\text{Ni}_3\text{Se}_2$  (211)/ $\text{Ni}_3\text{S}_2$  (211) heterojunction surface structure model; and (b) the structure model of adsorption of  $\text{H}_2\text{O}$ ; (c) Structure model of adsorption of  $\text{H}_2\text{O}$  (intermediate); (d) Structure model of adsorption of OH+H; (e) Structure model of adsorption H.

### 3. Supplementary Tables:

**Supplementary Table S1.** Comparison of the OER activity of  $\text{Ni}_3\text{S}_2@\text{Ni}_3\text{Se}_2/\text{NF}$  with other reported non-noble metal-based electrocatalysts in basic media (1 M KOH).

### 4. Notes and references

## 1. Experimental Section

### 1.1. Materials

Nickel nitrate hexahydrate ( $\text{Ni}(\text{NO}_3)_2 \cdot 6\text{H}_2\text{O}$ ), vanadium trichloride ( $\text{VCl}_3$ ), selenium dioxide ( $\text{SeO}_2$ ), hydrazine hydrate ( $\text{N}_2\text{H}_4 \cdot \text{H}_2\text{O}$ ), ethanol ( $\text{C}_2\text{H}_5\text{OH}$ ), hydrochloric acid ( $\text{HCl}$ ), ruthenic dioxide ( $\text{RuO}_2$ ) and Nafion (5 wt%) were purchased from Sinopharm Chemical Reagent Co., Ltd. Milli-Q ultrapure water was used for all experiments. Nickel foam (NF) was used as the substrate. All chemicals were analytical grade and used as received without further purification.

### 1.2. Preparation of $\text{RuO}_2$ electrode on NF

A total of 1.2 mg  $\text{RuO}_2$  powder was dispersed in 350  $\mu\text{L}$  deionized water, 500  $\mu\text{L}$  of ethanol, and 50  $\mu\text{L}$  of 15 wt% Nafion solution through ultrasound for 30 min to form a uniform suspension. 300  $\mu\text{L}$  of powder ink was loaded onto as-cleaned NF ( $1 \times 1 \text{ cm}^2$ ), followed by the dry air at room temperature (Fig. S1e). The average mass loading of  $\text{RuO}_2$  on NF is about  $0.4 \text{ mg} \cdot \text{cm}^{-2}$ .

### 1.3. General characterizations

The morphology of as-prepared catalysts was characterized by a field-emission scanning electron microscope (FESEM, JSM-7610F, 15 kV). The morphologies of samples were further confirmed by transmission electron microscope (TEM, Titan3 G2 60-300, 300 kV). The elemental distributions of the samples were characterized by the energy-dispersive X-ray spectroscopy (EDS) mapping affiliated with the TEM, and the EDS was also imaged from the TEM. Thermo Fisher Scientific K-Alpha was performed to get the X-ray photoelectron spectroscopy (XPS) data, using a monochromated source of X-rays (Mg  $\text{K}\alpha$ , photon energy 1253.6 eV) for excitation.

### 1.4. Electrochemical Test

All the electrochemical tests were proceeded in a standard three-electrode system by a CHI660E electrochemical station (CH Instruments, Inc., Shanghai) at room temperature. For detail,  $\text{Ni}_3\text{S}_2 @ \text{Ni}_3\text{Se}_2 / \text{NF}$  was directly used as the working electrode, a graphite carbon rod was used as the counter electrode, and a mercury oxide electrode ( $\text{Hg}/\text{HgO}$ ) was used as the reference electrode. All electrochemical measurements were carried out in a 1 M KOH solution. The measured potentials were transformed to a reversible hydrogen electrode (RHE) according to the equation:  $E_{\text{RHE}} = E_{\text{Hg}/\text{HgO}} + 0.059 \times \text{pH} + 0.098$ . The pH of 1 M KOH is measured to be 13.74. The OER measurements were recorded by linear sweep voltammetry (LSV) at a scan rate of  $5 \text{ mV s}^{-1}$ . Electrocatalytic stability was investigated by performing successive cyclic voltammetry (CV) sweeps in the voltage

range of 0-1.1 V at a scan rate of 40 mV/s. All polarization curves were corrected by  $i$ - $R$  losses. The plots of electrochemical impedance spectroscopy (EIS) were measured with 5 mV amplitude in a frequency of 0.01 Hz ~ 100 kHz.

To obtain the effective electrochemical active surface area (ECSA) of electrocatalysts, a series of cyclic voltammetry (CV) measurements were executed first at various scan rates (5, 10, 15 mV s<sup>-1</sup>, etc.). By plotting the difference of current density ( $J$ ) between the anodic and cathodic sweeps ( $J_{\text{anodic}} - J_{\text{cathodic}}$ ) against the scan rate, a linear trend was constructed. Then, the geometric double-layer capacitance ( $C_{\text{dl}}$ ) was easily calculated.

2. Supplementary Figures:

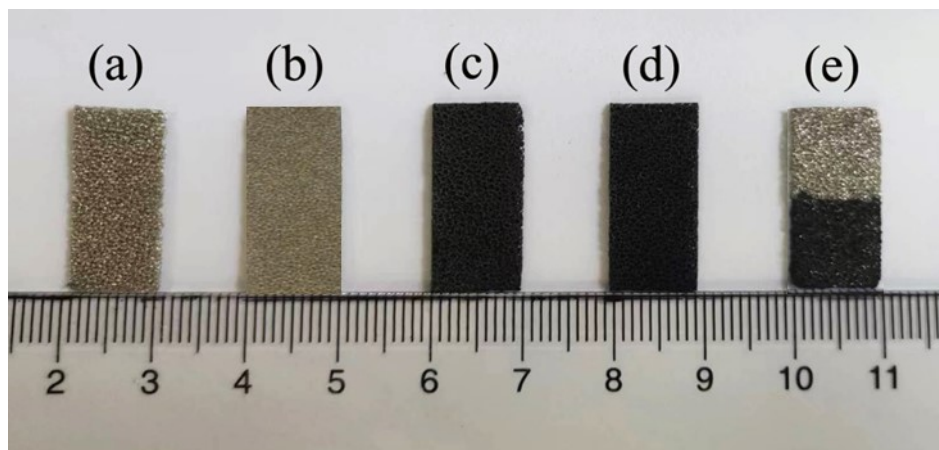

**Fig. S1.** Optical image of (a) the bare NF, (b)  $\text{Ni}_3\text{S}_2/\text{NF}$ , (c)  $\text{Ni}_3\text{Se}_2/\text{NF}$ , (d)  $\text{Ni}_3\text{S}_2@\text{Ni}_3\text{Se}_2/\text{NF}$  and (e)  $\text{RuO}_2/\text{NF}$ , respectively.

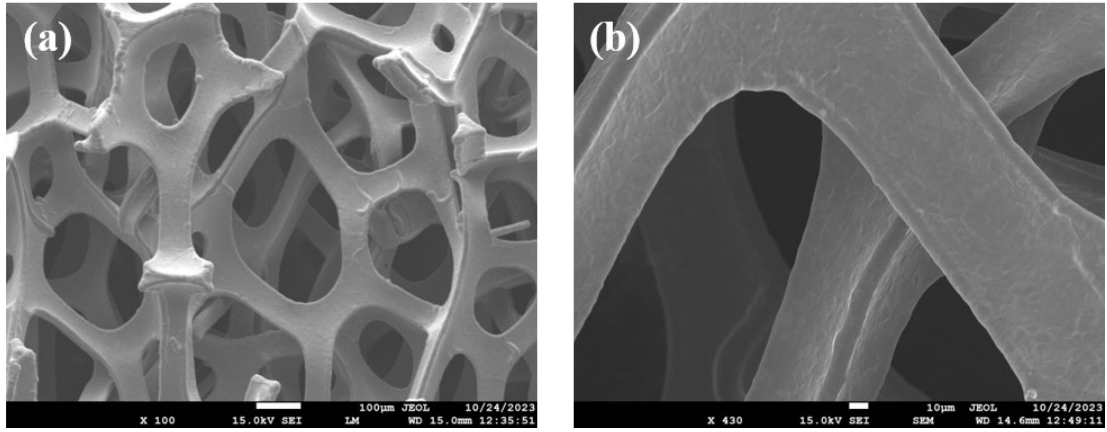

**Fig. S2.** The SEM images of bare NF (a) with low magnification, (b) with high magnification.

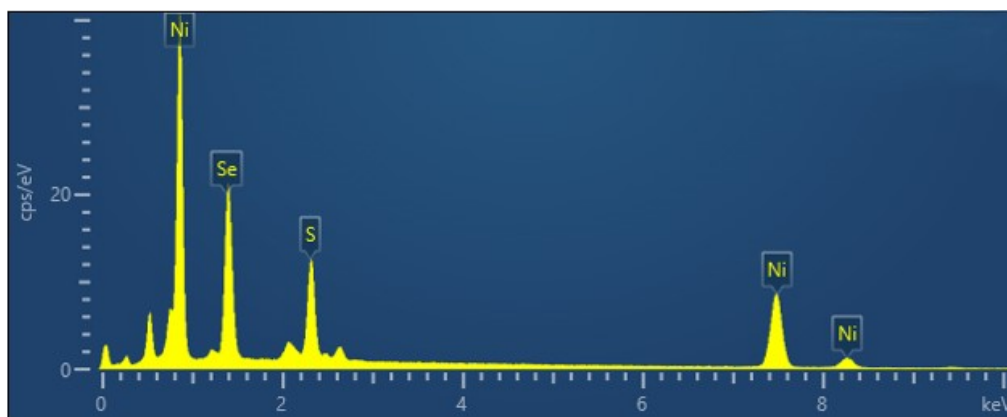

**Fig. S3.** The EDS spectrum of  $\text{Ni}_3\text{S}_2@\text{Ni}_3\text{Se}_2/\text{NF}$  electrode.



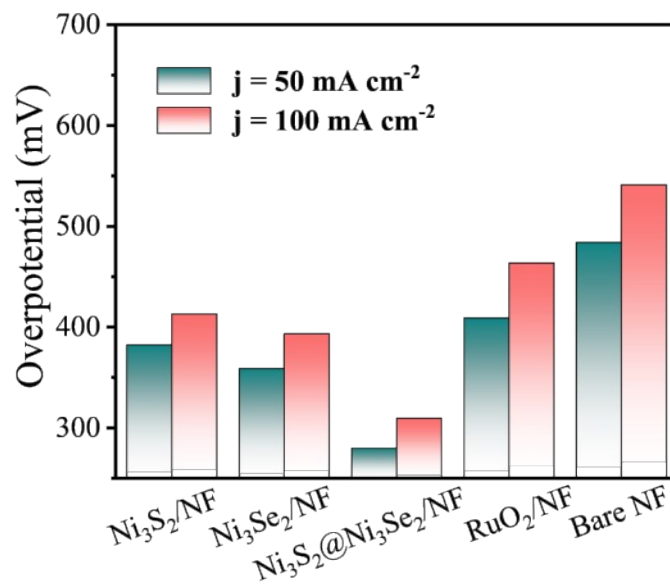

**Fig. S4.** Comparison of overpotentials of different current densities under OER test in 1 M KOH electrolyte.

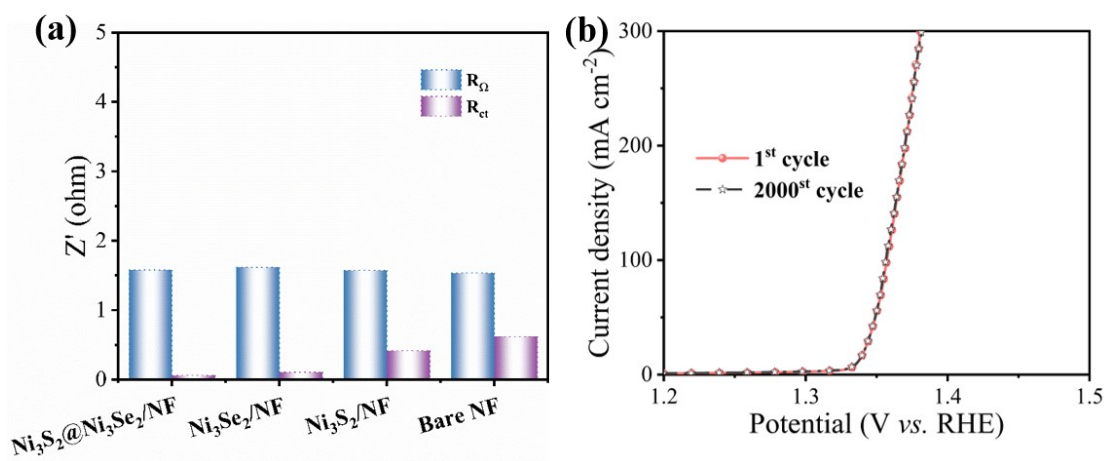

**Fig. S5.** (a) comparisons of the EIS parameter and (b) Polarization curves were recorded initially and after 2000 CV cycles for  $Ni_3S_2@Ni_3Se_2/NF$  of urea test in 1 M KOH + 0.33 M urea.

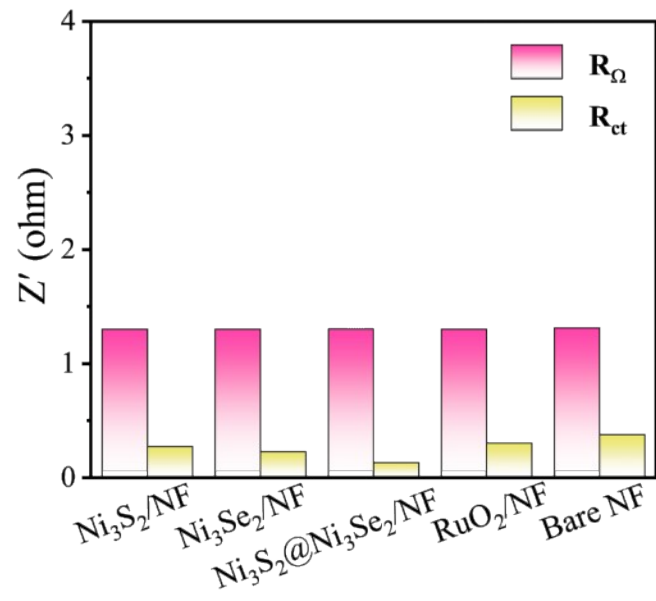

**Fig. S6.** Comparisons of the EIS parameter of OER test in 1.0 M KOH.

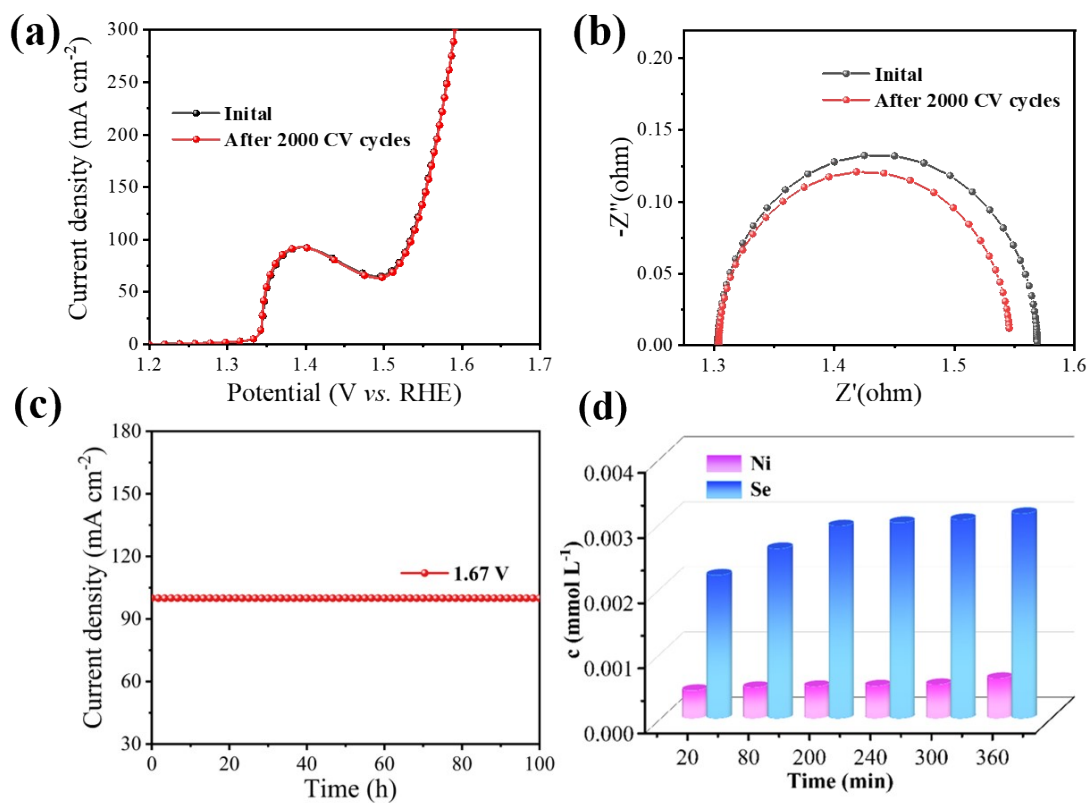

**Fig. S7.** Electrocatalytic stability. (a-b) Polarization curves and Nyquist plots of  $\text{Ni}_3\text{S}_2@\text{Ni}_3\text{Se}_2/\text{NF}$  electric catalyst initially as well as after 2000 CV cycles; (c) Chronopotentiometry curve of the  $\text{Ni}_3\text{S}_2@\text{Ni}_3\text{Se}_2/\text{NF}$  recorded at 1.67 V for 100 h; (d) Time-dependent concentration of dissolved Ni and Se in 1 M KOH.

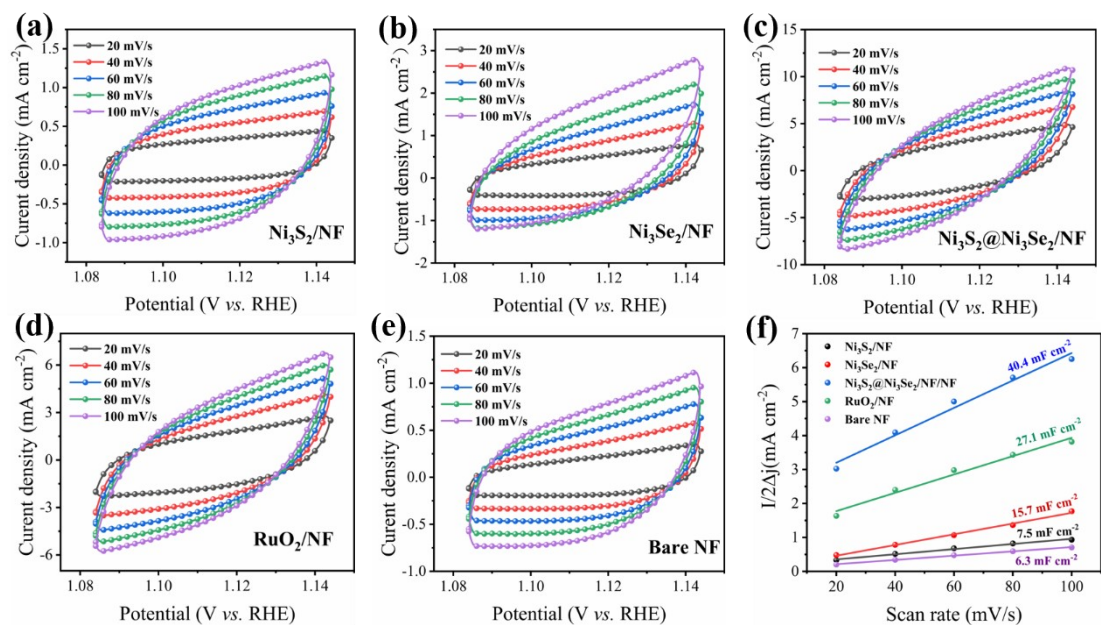

**Fig. S8.** Active site test CV curves of (a)  $\text{Ni}_3\text{S}_2/\text{NF}$ , (b)  $\text{Ni}_3\text{Se}_2/\text{NF}$ , (c)  $\text{Ni}_3\text{S}_2@\text{Ni}_3\text{Se}_2/\text{NF}$ , (d)  $\text{RuO}_2/\text{NF}$  and (e) Bare NF at different scanning rates in 1 M KOH; (f) current density as a function of scanning rate.

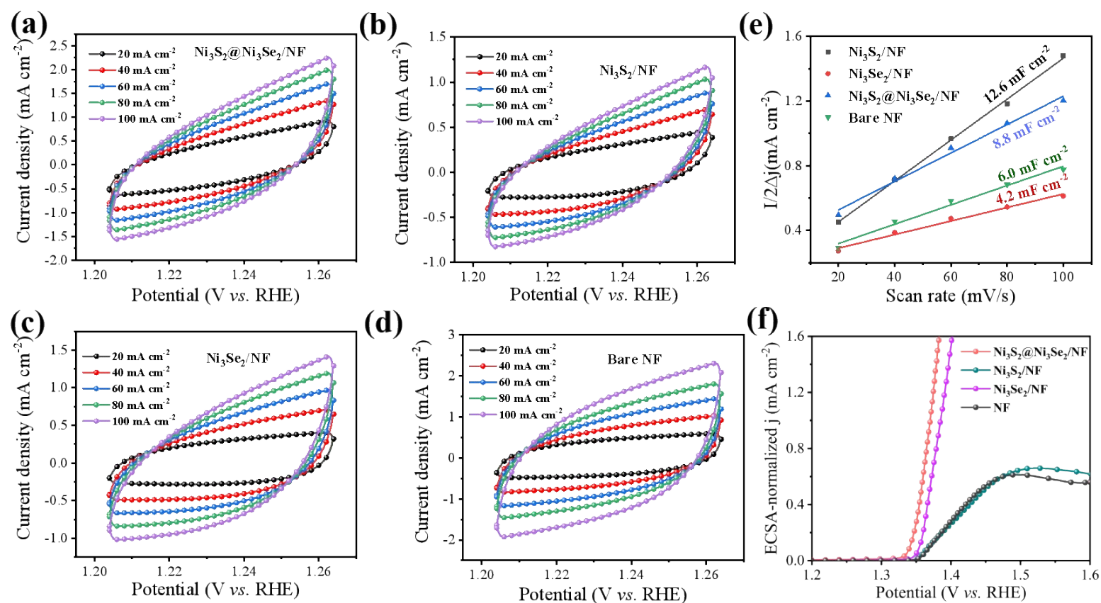

**Fig. S9.** Active site test CV curves of (a) Ni<sub>3</sub>S<sub>2</sub>@Ni<sub>3</sub>Se<sub>2</sub>/NF, (b) Ni<sub>3</sub>S<sub>2</sub>/NF (c) Ni<sub>3</sub>Se<sub>2</sub>/NF, (d) Bare NF at different scanning rates in 1 M KOH + 0.33 M urea; (e) current density as a function of scanning rate; (f) ECSA-normalized LSV curves.

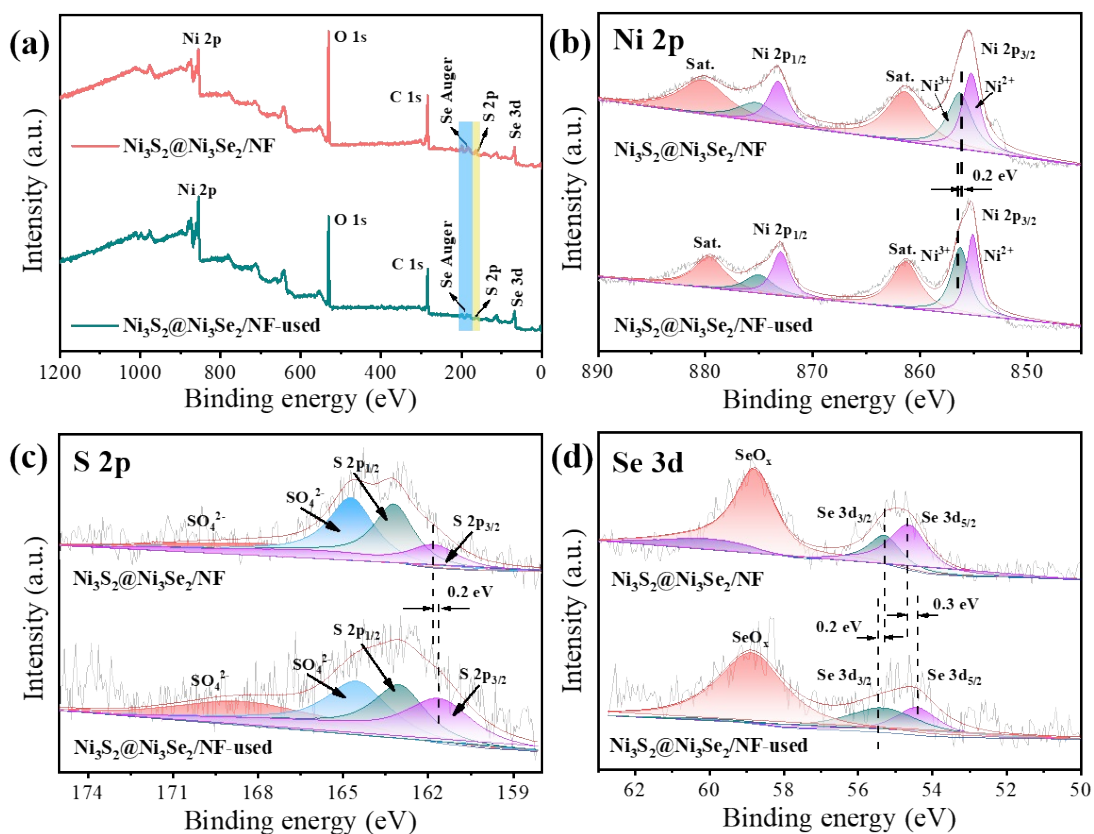

**Fig. S10.** (a) The physical characterization for  $\text{Ni}_3\text{S}_2@\text{Ni}_3\text{Se}_2/\text{NF}$  after OER test. The XPS survey spectrum of  $\text{Ni}_3\text{S}_2@\text{Ni}_3\text{Se}_2/\text{NF}$ , the spectra of (b) Ni 2p, (c) S 2p, and (d) Se 3d of  $\text{Ni}_3\text{S}_2@\text{Ni}_3\text{Se}_2/\text{NF}$ .

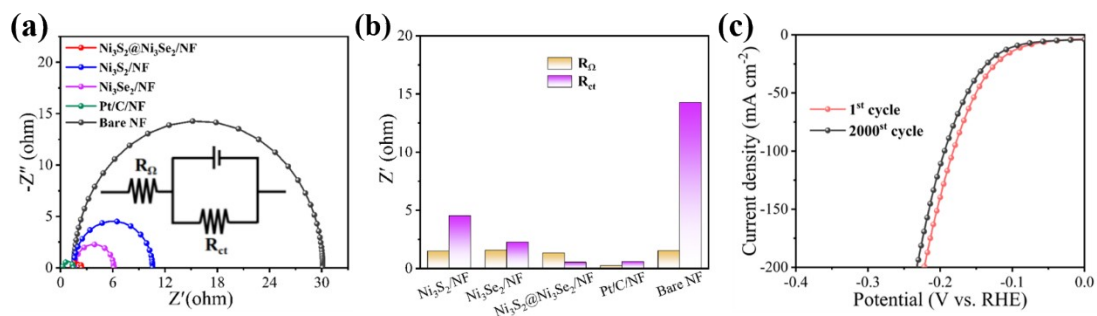

**Fig. S11.** (a) EIS Nyquist plots of  $\text{Ni}_3\text{S}_2@/\text{Ni}_3\text{Se}_2/\text{NF}$ ,  $\text{Ni}_3\text{S}_2/\text{NF}$ ,  $\text{Ni}_3\text{Se}_2/\text{NF}$ ,  $\text{Pt}/\text{C}/\text{NF}$  and Bare NF.

(b) Comparisons of the EIS parameter. (c) Polarization curves were recorded initially and after 2000

CV cycles for  $\text{Ni}_3\text{S}_2@/\text{Ni}_3\text{Se}_2/\text{NF}$ .



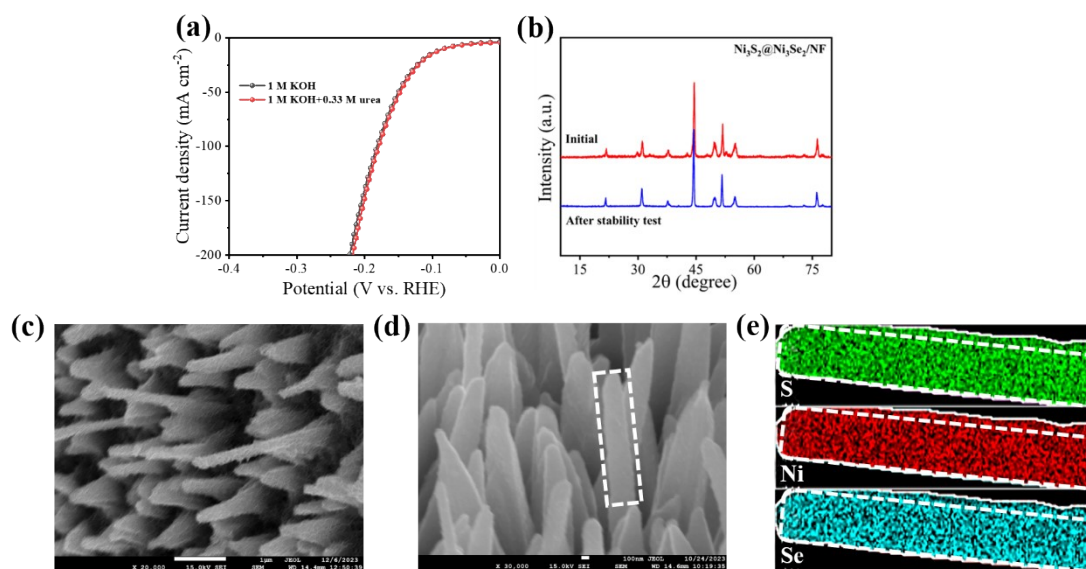

**Fig. S12.** (a) Ni<sub>3</sub>S<sub>2</sub>@Ni<sub>3</sub>Se<sub>2</sub>/NF polarization curves in different electrolytes, (b) XRD, (c-d) SEM images and (e) EDX elemental mappings of Ni<sub>3</sub>S<sub>2</sub>@Ni<sub>3</sub>Se<sub>2</sub>/NF before and after stability test.

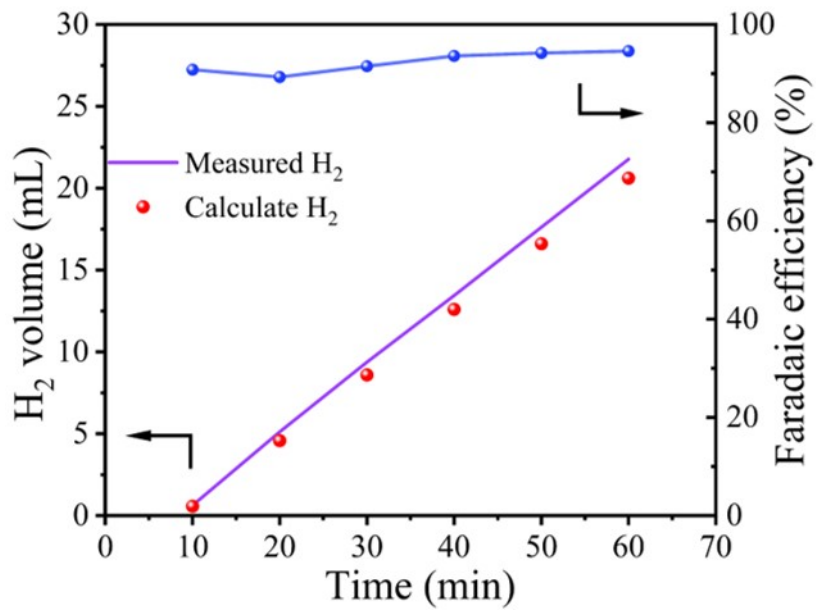

**Fig. S13.** The Faraday efficiency vs time plots in hydrogen production system assisted by urea electrocatalysis

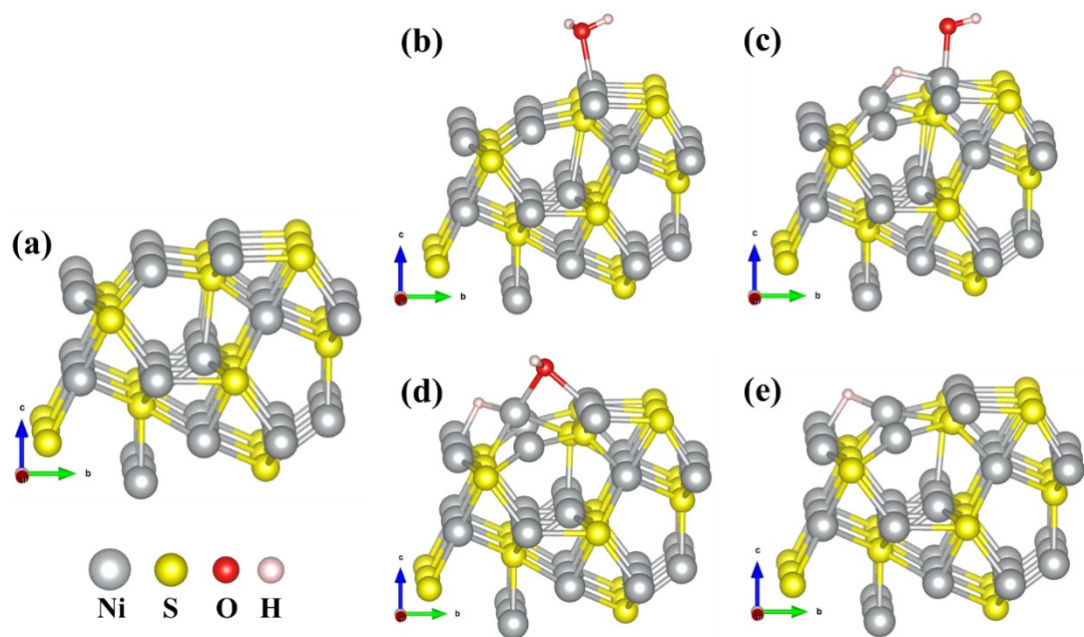

**Fig. S14.** (a)  $\text{Ni}_3\text{S}_2$  (211) surface structure model; and (b) the structure model of adsorption of  $\text{H}_2\text{O}$ ; (c) Structure model of adsorption of  $\text{H}_2\text{O}$  (intermediate); (d) Structure model of adsorption of  $\text{OH}+\text{H}$ ; (e) Structure model of adsorption H.

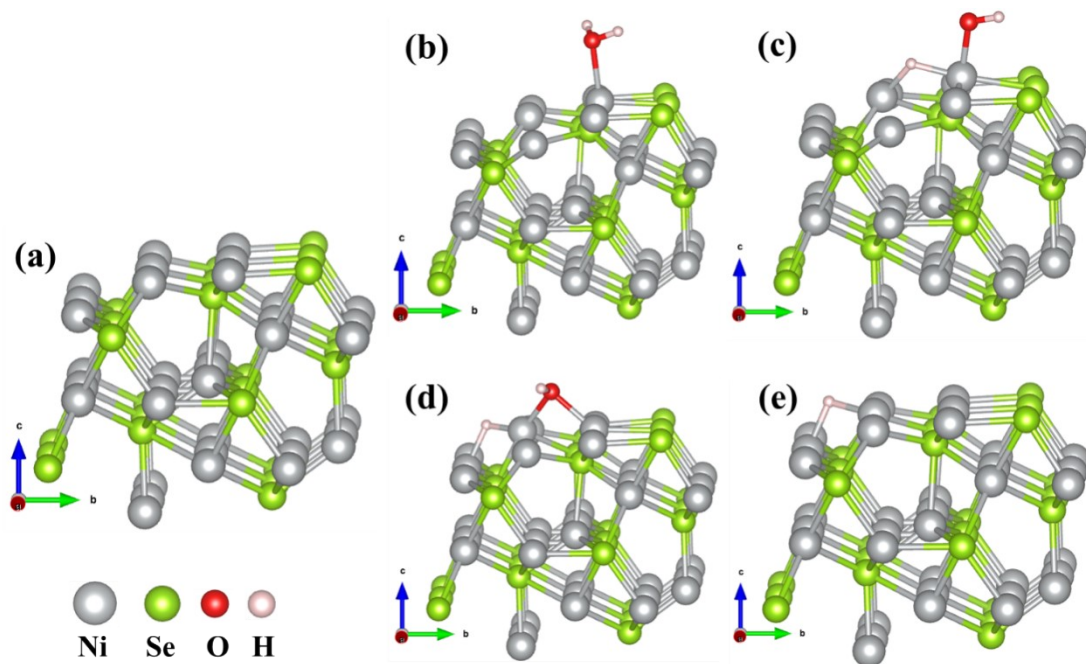

**Fig. S15.** (a)  $\text{Ni}_3\text{Se}_2$  (211) surface structure model; and (b) the structure model of adsorption of  $\text{H}_2\text{O}$ ; (c) Structure model of adsorption of  $\text{H}_2\text{O}$  (intermediate); (d) Structure model of adsorption of  $\text{OH}+\text{H}$ ; (e) Structure model of adsorption H.

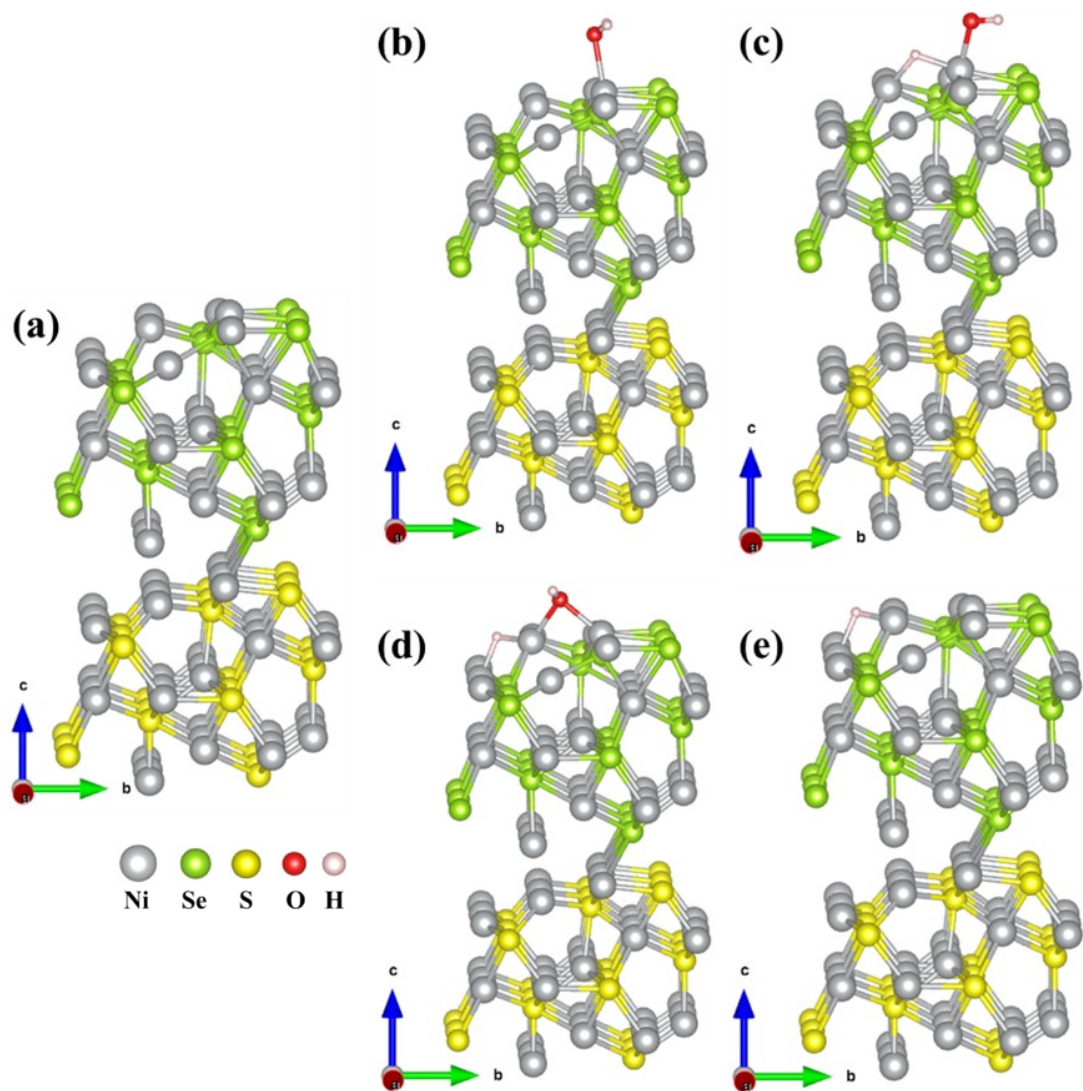

**Fig. S16.** (a)  $\text{Ni}_3\text{Se}_2(211)/\text{Ni}_3\text{S}_2(211)$  heterojunction surface structure model; and (b) the structure model of adsorption of  $\text{H}_2\text{O}$ ; (c) Structure model of adsorption of  $\text{H}_2\text{O}$  (intermediate); (d) Structure model of adsorption of  $\text{OH}+\text{H}$ ; (e) Structure model of adsorption H.

**Supplementary Tables:**

**Supplementary Table S1** Comparison of the OER activity of Ni<sub>3</sub>S<sub>2</sub>@Ni<sub>3</sub>Se<sub>2</sub>/NF with other reported non-noble metal-based electrocatalysts in basic media (1 M KOH).

| Catalysts                                                           | Current density (mA cm <sup>-2</sup> ) | overpotential (mV) | Reference                                                          |
|---------------------------------------------------------------------|----------------------------------------|--------------------|--------------------------------------------------------------------|
| Ni <sub>3</sub> S <sub>2</sub> @Ni <sub>3</sub> Se <sub>2</sub> /NF | 10                                     | 234.89             | This work                                                          |
| CoSe <sub>2</sub> @Fe-CoO                                           | 10                                     | 280                | [1] Journal of Materials Science & Technology, 2021, 78: 229-237.  |
| Ni <sub>0.85</sub> Se-O/CN                                          | 10                                     | 240                | [2] Chemical Engineering Journal, 2023, 454: 140291.               |
| NiSe <sub>2</sub> @Fe-NiCo LDH                                      | 10                                     | 260                | [3] International Journal of Hydrogen Energy, 2024, 51: 1154-1166. |
| NiSe <sub>2</sub> @MoS <sub>2</sub>                                 | 10                                     | 267                | [4] RSC advances, 2021, 11(43): 26928-26936.                       |
| Ni <sub>0.94</sub> Fe <sub>0.06</sub> Se <sub>2</sub>               | 10                                     | 279                | [5] Journal of materials chemistry A, 2020, 8(16): 8113-8120.      |
| P-NiSe <sub>2</sub> @N-CNTs/NC                                      | 10                                     | 306                | [6] Journal of Energy Chemistry, 2021, 60: 111-120.                |
| Fe <sub>0.2</sub> Ni <sub>0.8</sub> Se <sub>2</sub>                 | 10                                     | 242                | [7] Chemical Physics Letters, 2022, 808: 140126.                   |
| Ni <sub>0.8</sub> Fe <sub>0.2</sub> Se <sub>2</sub> /CC             | 10                                     | 257                | [8] Electrochimica Acta, 2022, 425: 140711.                        |
| Fe <sub>0.5</sub> Ni <sub>0.5</sub> Se <sub>2</sub>                 | 10                                     | 250                | [9] Chemical Engineering Journal, 2023, 464: 142620.               |
| Co-COF-C <sub>4</sub> N                                             | 10                                     | 280                | [10] Applied Catalysis B: Environmental, 2023, 325: 122366.        |
| MoS <sub>2</sub>                                                    | 10                                     | 300                | [11] Small, 2023, 19(14): 2207177.                                 |
| MnSe@MWCNT                                                          | 10                                     | 290                | [12] Journal of Materials Chemistry A, 2022, 10(12): 6772-6784.    |

|                                                                     |    |     |                                                                            |
|---------------------------------------------------------------------|----|-----|----------------------------------------------------------------------------|
| CuNi@NiSe                                                           | 10 | 293 | [13] Small, 2023, 19(33): 2301613.                                         |
| S/N-CMF@FexCoyNi <sub>1-x-y</sub> -MOF                              | 10 | 296 | [14] Advanced Materials, 2023, 35(19): 2207888.                            |
| Cu-(a-NiSe <sub>x</sub> /c-NiSe <sub>2</sub> )/TiO <sub>2</sub> NRs | 10 | 339 | [15] Chemical Engineering Journal, 2021, 422: 130048.                      |
| Fe <sub>2</sub> O <sub>3</sub> -Fe(Ni)S/C-200                       | 10 | 264 | [16] Small, 2023: 2307808.                                                 |
| Cr <sub>x</sub> Ni <sub>1-x</sub> Se <sub>2</sub>                   | 10 | 272 | [17] Nano Research, 2023: 1-10.                                            |
| Ni SAs@S/N-CMF                                                      | 10 | 221 | [18] Advanced Materials, 2022, 34(35): 2203442.                            |
| NiCl <sub>2</sub> (CH <sub>3</sub> CSNH <sub>2</sub> ) <sub>4</sub> | 10 | 250 | [19] Applied Catalysis B: Environmental, 2022, 312: 121389.                |
| Mo-O <sub>2</sub> S <sub>2</sub> -C                                 | 10 | 324 | [20] Journal of the American Chemical Society, 2022, 144(45): 20571-20581. |

#### 4. Notes and references

- [1] M. Ramadoss, Y. F. Chen, Y. Hu, B. Wang, R. Jeyagopal, K. Marimuthu, X. Q. Wang, D. X. Yang, Hierarchically porous nanoarchitecture constructed by ultrathin CoSe<sub>2</sub> embedded Fe-CoO nanosheets as robust electrocatalyst for water oxidation, *J. Mater. Sci. Technol.* 78 (2021) 229-237.
- [2] C. Zhang, W. Xu, S. T. Li, X. Z. Wang, Z. Y. Guan, M. L. Zhang, J. Wu, X. X. Ma, M. L. Wu, Y. F. Qi, Core-shell heterojunction engineering of Ni<sub>0.85</sub>Se-O/CN electrocatalyst for efficient OER, *Chem. Eng. J.* 454 (2023) 140291.
- [3] Q. R. Wang, C. Wang, X. Q. Du, X. S. Zhang, Combinational modulations of NiSe<sub>2</sub> nanodendrites by phase engineering and iron-doping towards efficient oxygen evolution reaction, *Int. J. Hydrogen Energy*, 51 (2024) 1154-1166.
- [4] Y. Z. Huang, J. C. Huang, K. S. Xu, R. Geng, Constructing NiSe<sub>2</sub>@MoS<sub>2</sub> nano-heterostructures on a carbon fiber paper for electrocatalytic oxygen evolution, *RSC Adv.* 11 (2021) 26928-26936.
- [5] J. Zhou, L. W. Yuan, J. W. Wang, L. L. Song, Y. You, R. Zhou, J. J. Zhang, J. Xu, Combinational modulations of NiSe<sub>2</sub> nanodendrites by phase engineering and iron-doping towards an efficient oxygen evolution reaction, *J. Mater. Chem. A.* 8 (2020) 8113-8120.
- [6] J. Yu, W. J. Li, G. B. Kao, C. Y. Xu, R. R. Chen, Q. Liu, J. Y. Liu, H. S. Zhang, J. Wang, In-situ growth of CNTs encapsulating P-doped NiSe<sub>2</sub> nanoparticles on carbon framework as efficient bifunctional electrocatalyst for overall water splitting, *J. Energy Chem.* 60 (2021) 111-120.



- [7] C. Zhang, T. Li, Q. Z. Wei, Z. H. Cheng, J. Wu, X. X. Ma, Z. H. Chen, K. Y. Liu, T. Zhang, J. H. Liu, Fe-doped NiSe<sub>2</sub> nanoparticles as efficient and stable electrocatalysts for oxygen evolution reaction, *Chem. Phys. Lett.* 808 (2022) 140126.
- [8] Z. M. Tian, Y. X. Liu, Q. C. Xu, Y. Y. Shi, C. X. Ma, B. Peng, G. Y. Liu, J. N. Yang, W. J. Zheng, Fe-doped NiSe<sub>2</sub> nanoarrays to boost electrocatalytic oxygen evolution reaction, *Electrochim. Acta.* 425 (2022) 140711.
- [9] C. J. Xuan, Q. N. Xu, L. Han, B. S. Hou, Electronic structure exquisite modulation of NiSe<sub>2</sub> interface via rationally controlling Fe doping for boosting electrochemical oxygen evolution activity, *Chem. Eng. J.* 464 (2023) 142620.
- [10] R. Zhang, W. S. Liu, F. M. Zhang, Z. D. Yang, G. L. Zhang, X. C. Zeng, COF-C<sub>4</sub>N Nanosheets with uniformly anchored single metal sites for electrocatalytic OER: From theoretical screening to target synthesis, *Appl. Catal. B Environ.* 325 (2023) 122366.
- [11] B. Chen, P. Hu, F. Yang, X. J. Hua, F. F. Yang, F. Zhu, R. Y. Sun, K. Hao, K. S. Wang, Z. Y. Yin, In situ porousized MoS<sub>2</sub> nano islands enhance HER/OER bifunctional electrocatalysis, *Small.* 19 (2023) 2207177.
- [12] H. Singh, M. M. Hines, S. Chakravarty, M. Nath, Multi-walled carbon nanotube supported manganese selenide as a highly active bifunctional OER and ORR electrocatalyst, *J. Mater. Chem. A.* 10 (2022) 6772-6784.
- [13] D. Cao, J. Shao, Y. H. Cui, L. P. Zhang, D. J. Cheng, Interfacial engineering of copper-nickel selenide nanodendrites for enhanced overall water splitting in alkali condition, *Small.* 19 (2023) 2301613.

- [14] Y. F. Zhao, X. F. Lu, Z. P. Wu, Z. H. Pei, D. Y. Luan, X. W. D. Lou, Supporting Trimetallic Metal–Organic Frameworks on S/N - Doped Carbon Macroporous Fibers for Highly Efficient Electrocatalytic Oxygen Evolution, *Adv. Mater.* 35 (2023) 2207888.
- [15] K. R. Park, D. T. Tran, T. T. Nguyen, N. H. Kim, J. H. Lee, Copper-Incorporated heterostructures of amorphous NiS<sub>x</sub>/Crystalline NiSe<sub>2</sub> as an efficient electrocatalyst for overall water splitting, *Chem. Eng. J.* 422 (2021) 130048.
- [16] W. Q. Zhang, J. Ying, H. W. Liu, Biomineralization of Sulfate–Reducing Bacteria In Situ–Induced Preparation of Nano Fe<sub>2</sub>O<sub>3</sub> - Fe(Ni)S/C as High–Efficiency Oxygen Evolution Electrocatalyst, *Small.* 20 (2023) 2307808.
- [17] H. F. Fan, D. X. Jiao, J. C. Fan, D. W. Wang, B. Zaman, W. Zhang, L. Zhang, W. Zheng, X. Q. Cui, Kinetically and thermodynamically expediting elementary steps via high-valence Cr-incorporated of nickel selenide for water electrolysis, *Nano Res.* 17 (2023) 1199-1208.
- [18] Y. F. Zhao, Y. Guo, X. F. Lu, D. Y. Luan, X. J. Gu, X. W. D. Lou, Exposing Single Ni Atoms in Hollow S/N–Doped Carbon Macroporous Fibers for Highly Efficient Electrochemical Oxygen Evolution, *Adv. Mater.* 34 (2022) 2203442.
- [19] X. Jia, H. J. Kang, X. X. Yang, Y. L. Li, K. Cui, X. H. Wu, W. Qin, G. Wu, Amorphous Ni (III)-based sulfides as bifunctional water and urea oxidation anode electrocatalysts for hydrogen generation from urea-containing water, *Appl. Catal. B Environ.* 312 (2022) 121389.

[20] Y. Z. Zhao, Z. L. Zhang, L. Liu, Y. Wang, T. Wu, W. J. Qin, S. J. Liu, B. R. Jia, H. Y. Wu, D. Y. Zhang, X. H. Qu, G. G. Qi, E. P. Giannelis, M. L. Qin, S. J. Guo, S and O co-coordinated Mo single sites in hierarchically porous tubes from sulfur–enamine copolymerization for oxygen reduction and evolution, *J. Am. Chem. Soc.* 144 (2022) 20571-20581.
